# Supplementary material for: Lipoprofiling Assessed by NMR Spectroscopy in Patients with Acute Coronary Syndromes: Is There a Need for Fasting Prior to Sampling?
Source: MDPI journal article supplement (doi:10.3390/diagnostics12071675), 2022-07-10
Supplement: s1 [file s1]

## **SUPPLEMENTARY INFORMATION FOR:**

### **Lipoproteins assayed by NMR spectroscopy in cardiovascular emergency units. Is need for fasting prior to sampling?**

Laura-Adina Stănciulescu, Alexandru Scafa, Cătălin Duduianu, Raluca Stan, Alina Nicolescu,  
Calin Deleanu and Maria Dorobanțu

#### **Lipoprotein Main fractions and densities:**

High Density Lipoprotein (HDL): 1.063 - 1.210 kg/L

Low Density Lipoprotein (LDL): 1.019 - 1.063 kg/L

Intermediate Density Lipoprotein (IDL): 1.006 - 1.019 kg/L

Very Low Density Lipoprotein (VLDL): 0.950 - 1.006 kg/L

#### **High Density Lipoprotein Subfractions:**

HDL-1: 1.063 - 1.100 kg/L

HDL-2: 1.100 - 1.112 kg/L

HDL-3: 1.112 - 1.125 kg/L

HDL-4: 1.125 - 1.210 kg/L

#### **Low Density Lipoprotein Subfractions**

##### **(LDL1-3: Large LDL; LDL4-6: Small Dense LDL):**

LDL-1: 1.019 - 1.031 kg/L

LDL-2: 1.031 - 1.034 kg/L

LDL-3: 1.034 - 1.037 kg/L

LDL-4: 1.037 - 1.040 kg/L

LDL-5: 1.040 - 1.044 kg/L

LDL-6: 1.044 - 1.063 kg/L

#### **Very Low Density Lipoprotein Subfractions:**

VLDL-1, VLDL-2, VLDL-3, VLDL-4, VLDL-5, numbering according to increasing density with subfractions properties are specified in [S1].

[S1] Lindgren FT, Jensen LL, Hatch FT (1972) The isolation and quantitative analysis of serum lipoproteins. In: Nelson GJ (ed.) Blood lipids and lipoproteins: Quantitation, composition and metabolism. Wiley-Interscience, New York, p 181-274.

#### **Lipoprotein Abbreviations and measuring units:**

|                    |                  |      |       |
|--------------------|------------------|------|-------|
| Total Plasma/Serum | Triglycerides    | TPTG | mg/dL |
| Total Plasma/Serum | Cholesterol      | TPCH | mg/dL |
| Total Plasma/Serum | Free Cholesterol | TPFC | mg/dL |
| Total Plasma/Serum | Apo-A1           | TPA1 | mg/dL |

Total Plasma/Serum Apo-A2 TPA2 mg/dL  
 Total Plasma/Serum Apo-B100 TPAB mg/dL  
 Total Plasma/Serum Particle Number TPPN nmol/L  
 Total Plasma/Serum Apo-B100/Apo-A1 ratio TBA1 -/-  
 Total Plasma/Serum LDL-Cho/HDL-Cho ratio LDHD -/-  
 VLDL Triglycerides mg/dL  
 VLDL Cholesterol VLCH mg/dL  
 VLDL Free Cholesterol VLFC mg/dL  
 VLDL Phospholipids VLPL mg/dL  
 VLDL Apo-B100 VLAB mg/dL  
 VLDL Particle Number VLPN nmol/L  
 IDL Triglycerides mg/dL  
 IDL Cholesterol IDCH mg/dL  
 IDL Free Cholesterol IDFC mg/dL  
 IDL Phospholipids IDPL mg/dL  
 IDL Apo-B100 IDAB mg/dL  
 IDL Particle Number IDPN nmol/L  
 LDL Triglycerides mg/dL  
 LDL Cholesterol LDCH mg/dL  
 LDL Free Cholesterol LDFC mg/dL  
 LDL Phospholipids LDPL mg/dL  
 LDL Apo-B100 LDAB mg/dL  
 LDL Particle Number LDPN nmol/L  
 HDL Triglycerides mg/dL  
 HDL Cholesterol HDCH mg/dL  
 HDL Free Cholesterol HDFC mg/dL  
 HDL Phospholipids HDPL mg/dL  
 HDL Apo-A1 HDA1 mg/dL  
 HDL Apo-A2 HDA2 mg/dL  
 VLDL-1 Triglycerides V1TG mg/dL  
 VLDL-1 Cholesterol V1CH mg/dL  
 VLDL-1 Free Cholesterol V1FC mg/dL  
 VLDL-1 Phospholipids V1PL mg/dL  
 VLDL-2 Triglycerides V2TG mg/dL  
 VLDL-2 Cholesterol V2CH mg/dL  
 VLDL-2 Free Cholesterol V2FC mg/dL  
 VLDL-2 Phospholipids V2PL mg/dL  
 VLDL-3 Triglycerides V3TG mg/dL  
 VLDL-3 Cholesterol V3CH mg/dL  
 VLDL-3 Free Cholesterol V3FC mg/dL  
 VLDL-3 Phospholipids V3PL mg/dL  
 VLDL-4 Triglycerides V4TG mg/dL  
 VLDL-4 Cholesterol V4CH mg/dL  
 VLDL-4 Free Cholesterol V4FC mg/dL  
 VLDL-4 Phospholipids V4PL mg/dL  
 VLDL-5 Triglycerides V5TG mg/dL

VLDL-5 Cholesterol V5CH mg/dL  
 VLDL-5 Free Cholesterol V5FC mg/dL  
 VLDL-5 Phospholipids V5PL mg/dL  
 VLDL-6 Triglycerides V6TG mg/dL  
 VLDL-6 Cholesterol V6CH mg/dL  
 VLDL-6 Free Cholesterol V6FC mg/dL  
 VLDL-6 Phospholipids V6PL mg/dL  
 LDL-1 Triglycerides L1TG mg/dL  
 LDL-1 Cholesterol L1CH mg/dL  
 LDL-1 Free Cholesterol L1FC mg/dL  
 LDL-1 Phospholipids L1PL mg/dL  
 LDL-1 Apo-B100 L1AB mg/dL  
 LDL-1 Particle Number L1PN nmol/L  
 LDL-2 Triglycerides L2TG mg/dL  
 LDL-2 Cholesterol L2CH mg/dL  
 LDL-2 Free Cholesterol L2FC mg/dL  
 LDL-2 Phospholipids L2PL mg/dL  
 LDL-2 Apo-B100 L2AB mg/dL  
 LDL-2 Particle Number L2PN nmol/L  
 LDL-3 Triglycerides L3TG mg/dL  
 LDL-3 Cholesterol L3CH mg/dL  
 LDL-3 Free Cholesterol L3FC mg/dL  
 LDL-3 Phospholipids L3PL mg/dL  
 LDL-3 Apo-B100 L3AB mg/dL  
 LDL-3 Particle Number L3PN nmol/L  
 LDL-4 Triglycerides L4TG mg/dL  
 LDL-4 Cholesterol L4CH mg/dL  
 LDL-4 Free Cholesterol L4FC mg/dL  
 LDL-4 Phospholipids L4PL mg/dL  
 LDL-4 Apo-B100 L4AB mg/dL  
 LDL-4 Particle Number L4PN nmol/L  
 LDL-5 Triglycerides L5TG mg/dL  
 LDL-5 Cholesterol L5CH mg/dL  
 LDL-5 Free Cholesterol L5FC mg/dL  
 LDL-5 Phospholipids L5PL mg/dL  
 LDL-5 Apo-B100 L5AB mg/dL  
 LDL-5 Particle Number L5PN nmol/L  
 LDL-6 Cholesterol L6CH mg/dL  
 LDL-6 Triglycerides L6TG mg/dL  
 LDL-6 Free Cholesterol L6FC mg/dL  
 LDL-6 Phospholipids L6PL mg/dL  
 LDL-6 Apo-B100 L6AB mg/dL  
 LDL-6 Particle Number L6PN nmol/L  
 HDL-1 Triglycerides H1TG mg/dL  
 HDL-1 Cholesterol H1CH mg/dL  
 HDL-1 Free Cholesterol H1FC mg/dL

HDL-1 Phospholipids H1PL mg/dL  
 HDL-1 Apo-A1 H1A1 mg/dL  
 HDL-1 Apo-A2 H1A2 mg/dL  
 HDL-2 Triglycerides H2TG mg/dL  
 HDL-2 Cholesterol H2CH mg/dL  
 HDL-2 Free Cholesterol H2FC mg/dL  
 HDL-2 Phospholipids H2PL mg/dL  
 HDL-2 Apo-A1 H2A1 mg/dL  
 HDL-2 Apo-A2 H2A2 mg/dL  
 HDL-3 Triglycerides H3TG mg/dL  
 HDL-3 Cholesterol H3CH mg/dL  
 HDL-3 Free Cholesterol H3FC mg/dL  
 HDL-3 Phospholipids H3PL mg/dL  
 HDL-3 Apo-A1 H3A1 mg/dL  
 HDL-3 Apo-A2 H3A2 mg/dL  
 HDL-4 Triglycerides H4TG mg/dL  
 HDL-4 Cholesterol H4CH mg/dL  
 HDL-4 Free Cholesterol H4FC mg/dL  
 HDL-4 Phospholipids H4PL mg/dL  
 HDL-4 Apo-A1 H4A1 mg/dL  
 HDL-4 Apo-A2 H4A2 mg/dL

### Other Abbreviations:

ACS acute coronary syndromes  
 MI myocardial infarction  
 EMI elevation myocardial infarction  
 NSTEMI non-ST-elevation myocardial infarction  
 STEMI ST-elevation MI  
 NMR nuclear magnetic resonance spectroscopy  
 CV cardiovascular  
 CVD cardiovascular disease  
 ACD Atherosclerotic cardiovascular disease  
 CAD coronary artery disease  
 IHD ischaemic heart disease  
 TSP sodium 3-(trimethylsilyl)-[2,2,3,3-d<sub>4</sub>]-1-propionate  
 Ala alanine  
 Crn creatinine  
 Glut glutamine  
 Gly glycine  
 His histidine  
 i-Leu isoleucine  
 Phe phenylalanine  
 Tyr tyrosine  
 Val valine  
 Ac acetic acid

|       |                                      |
|-------|--------------------------------------|
| Cit   | citric acid                          |
| For   | formic acid                          |
| Lac   | lactic acid                          |
| Pyr   | pyruvic acid                         |
| Gluc  | glucose                              |
| s-LDL | small-dense Low Density Lipoproteins |
| l-LDL | large Low Density Lipoproteins       |
| m-LDL | medium Low Density Lipoproteins      |
| PN    | particle numbers                     |
| LDL-C | LDL cholesterol (LDCH)               |
| HDL-C | HDL cholesterol (HDCH)               |
